# Supplementary material for: Wide-angle X-ray Scattering studies on contemporary and ancient bast fibres used in textiles – ultrastructural studies on stinging nettle
Source: Research Square preprint supplement (doi:10.21203/rs.3.rs-231060/v1), 2021-04-27
Supplement: Supplementary file 1 [file 8ece33b3fc202cd06e577e32.xlsx]

## Sheet: Sheet1
Sample		Crystal width[nm]
TYA 912:523D		6.1 ± 0.5 nm
TYA 933:214:9:50		7 ± 0.2 nm
TYA 914:1607:8A		5.6 ± 0.2 nm
